# Supplementary material for: The mineralizing effect of zinc oxide-modified hydroxyapatite-based sealer on radicular dentin
Source: Springer Nature journal article supplement (doi:10.1007/s00784-019-02938-5), 2019-05-17
Supplement: MOESM1 [file 16731558]

Table S1. Raman intensities (in arbitrary units) of mineral and organic components in different disks from radicular dentin treated with oxipatite after 24 h and 12 m of storage.

|  | | | | | Cervical | | | | Middle | | | | Apical | | | |
| --- | --- | --- | --- | --- | --- | --- | --- | --- | --- | --- | --- | --- | --- | --- | --- | --- |
| **Inner** | | **Outer** | | **Inner** | | **Outer** | | **Inner** | | **Outer** | |
| **24h** | **12m** | **24h** | **12m** | **24h** | **12m** | **24h** | **12m** | **24h** | **12m** | **24h** | **12m** |
| MINERAL COMPONENTS | **Relative Presence**  **of Mineral** | Phosphate  [960 cm-1] | | Peak | 720.66 | 834.17 | 909.83 | 839.64 | 779.76 | 835.21 | 777.62 | 789.28 | 807.68 | 858.84 | 867.78 | 905.71 |
| Area | 19428.90 | 20316.40 | 21178.80 | 19251.00 | 22542.90 | 24689.70 | 22731.90 | 21278.70 | 23181.20 | 21785.20 | 22082.00 | 26773.80 |
| RMC*P* | 12.68 | 12.07 | 9.16 | 13.99 | 8.93 | 12.04 | 10.05 | 13.88 | 8.00 | 11.44 | 10.80 | 12.55 |
| Carbonate  [1070 cm-1] | | Peak | 111.49 | 138.01 | 164.03 | 141.29 | 143.11 | 137.04 | 128.60 | 142.54 | 152.523 | 138.79 | 145.87 | 154.50 |
| Area | 4689.00 | 5447.64 | 8491.73 | 5441.60 | 7457.62 | 5696.29 | 6124.97 | 5412.49 | 8276.42 | 6195.93 | 5976.09 | 5909.48 |
| **Phosphate Crystallinity (**FWHM*P*) | | | | 20.59 | 18.59 | 19.45 | 17.49 | 22.09 | 22.59 | 22.33 | 20.59 | 21.93 | 19.36 | 19.42 | 22.59 |
| **GMC** (Ratio 1070/960) | | | | 0.15 | 0.17 | 0.18 | 0.17 | 0.18 | 0.16 | 0.17 | 0.18 | 0.19 | 0.16 | 0.17 | 0.17 |
| *v2*[451 cm-1] | | | | 74.35 | 129.32 | 91.65 | 80.36 | 87.59 | 122.00 | 85.44 | 109.40 | 93.50 | 112.48 | 82.64 | 87.00 |
| Fluoridated Apatite [575 cm-1] | | | | 73.11 | 103.84 | 97.15 | 95.08 | 85.92 | 91.43 | 88.71 | 66.88 | 74.16 | 105.09 | 93.78 | 93.02 |
| *v1*[950 cm-1] | | | | 433.14 | 561.86 | 514.34 | 625.06 | 506.05 | 448.79 | 485.63 | 449.60 | 506.15 | 441.17 | 480.79 | 457.22 |
| *v1*[954 cm-1] | | | | 638.19 | 723.78 | 791.32 | 797.76 | 718.95 | 683.93 | 642.92 | 691.44 | 724.36 | 698.50 | 747.57 | 720.80 |
| *v1*[956 cm-1] | | | | 691.30 | 788.12 | 863.78 | 849.93 | 763.15 | 757.34 | 712.66 | 751.41 | 780.31 | 778.48 | 820.14 | 808.28 |
| *v1*[963 cm-1] | | | | 633.19 | 670.04 | 798.20 | 589.11 | 652.39 | 783.30 | 649.38 | 704.15 | 704.76 | 794.46 | 766.56 | 856.21 |
| *v1*[1003 cm-1] | | | | 55.75 | 68.27 | 99.09 | 58.71 | 88.32 | 69.68 | 78.41 | 56.86 | 97.97 | 74.06 | 80.22 | 74.08 |
| [1104 cm-1] | | | | 24.43 | 29.61 | 58.26 | 33.41 | 49.73 | 32.02 | 43.78 | 34.01 | 54.40 | 41.69 | 43.20 | 42.95 |
|  | | | | | | | | | | | | | | | | |  |  |  |  |  |  |  |  |  |  |  |  | 34.47 |
|  | | | | | **Cervical** | | | | **Middle** | | | | **Apical** | | | |  |  |  |  |  |  |  |  |  | 3.01 |
| **Inner** | | **Outer** | | **Inner** | | **Outer** | | **Inner** | | **Outer** | |
| **24h** | **12m** | **24h** | **12m** | **24h** | **12m** | **24h** | **12m** | **24h** | **12m** | **24h** | **12m** |
| ORGANIC COMPONENTS | **Normalization** | | Phenyl  [1001 cm-1] | | 56.85 | 69.10 | 99.36 | 60.01 | 87.31 | 69.34 | 77.41 | 56.86 | 101.02 | 75.05 | 80.35 | 72.16 |
| **Crosslinking** | | Pyridinium  [1032 cm-1] | | 58.00 | 79.27 | 88.06 | 80.74 | 81.29 | 80.57 | 78.70 | 75.51 | 80.66 | 81.97 | 81.67 | 86.63 |
| **Nature of**  **collagen** | | A-III  [1246-1270 cm-1] | | 39.10 | 34.20 | 60.54 | 54.65 | 45.23 | 35.88 | 41.92 | 52.22 | 41.83 | 46.99 | 51.46 | 48.25 |
| A-I  [1655-1667 cm-1] | | 16.34 | 16.95 | 82.23 | 30.02 | 32.90 | 16.49 | 29.41 | 28.07 | 44.84 | 30.43 | 30.39 | 28.95 |
| Ratio AI/AIII | | 0.42 | 0.50 | 1.36 | 0.55 | 0.73 | 0.46 | 0.70 | 0.54 | 1.07 | 0.65 | 0.59 | 0.60 |
| α-helices  [1340 cm-1] | | 16.75 | 13.75 | 22.12 | 16.20 | 12.52 | 14.82 | 12.62 | 13.66 | 16.45 | 11.83 | 16.16 | 13.43 |
| **Complementary indexes** | | Collagen [937 cm-1] | | 143.97 | 176.16 | 206.16 | 180.66 | 183.66 | 169.19 | 165.42 | 151.40 | 193.98 | 163.05 | 189.19 | 173.49 |
| Proteoglycans  [1062 cm-1] | | 93.71 | 118.59 | 142.92 | 130.25 | 127.03 | 105.89 | 110.65 | 113.80 | 133.13 | 110.44 | 122.16 | 117.76 |

Abbreviations: RMC: Relative Mineral Concentration between mineral/Phenyl (1003 cm-1); FWHM*P*: Full-width half-maximum of the phosphate band at 960 cm-1; GMC: Gradient in mineral content; A: amide; AGEs: advanced glycation end products. The peaks values had been normalized to the intensity of the Amide II band near 1510 cm-1.
